# Supplementary material
Source: HighWire-hosted journal article supplement (https://www.cmajopen.ca/content/suppl/2021/07/20/9.3.E765)
Supplement: 2020-0236-1-at.pdf [file 2020-0236-1-at.pdf]

**Supplemental Table 1.** OVID Medline search strategy with hits per search line

| Population                                                                                                                                                                                                                                                                                                               | Outcomes                                                                                                                                                                                                                                                                                                                                                                                                                                                                                                                                                                                                                                                                                                                                                                                                                                                                                                                                                                                                                                                                                                                                                                                                                                                                                                                                                                                                                                                                                                                                                                                                                                                                                                                      | Study Design                                                                                                                                                                                                                                                                                                                                 | Combination and Limiters <sup>3</sup>                                                                                                                                                                                                                                                                                                                                                                                                                                                                                                                                                                                                                                                                                                                                                                                                                                                                                                                                                                                                                                                                         |
|--------------------------------------------------------------------------------------------------------------------------------------------------------------------------------------------------------------------------------------------------------------------------------------------------------------------------|-------------------------------------------------------------------------------------------------------------------------------------------------------------------------------------------------------------------------------------------------------------------------------------------------------------------------------------------------------------------------------------------------------------------------------------------------------------------------------------------------------------------------------------------------------------------------------------------------------------------------------------------------------------------------------------------------------------------------------------------------------------------------------------------------------------------------------------------------------------------------------------------------------------------------------------------------------------------------------------------------------------------------------------------------------------------------------------------------------------------------------------------------------------------------------------------------------------------------------------------------------------------------------------------------------------------------------------------------------------------------------------------------------------------------------------------------------------------------------------------------------------------------------------------------------------------------------------------------------------------------------------------------------------------------------------------------------------------------------|----------------------------------------------------------------------------------------------------------------------------------------------------------------------------------------------------------------------------------------------------------------------------------------------------------------------------------------------|---------------------------------------------------------------------------------------------------------------------------------------------------------------------------------------------------------------------------------------------------------------------------------------------------------------------------------------------------------------------------------------------------------------------------------------------------------------------------------------------------------------------------------------------------------------------------------------------------------------------------------------------------------------------------------------------------------------------------------------------------------------------------------------------------------------------------------------------------------------------------------------------------------------------------------------------------------------------------------------------------------------------------------------------------------------------------------------------------------------|
| <i>Canadian Medical Learner<sup>1</sup></i>                                                                                                                                                                                                                                                                              | <i>Well-being Domains<sup>2</sup></i>                                                                                                                                                                                                                                                                                                                                                                                                                                                                                                                                                                                                                                                                                                                                                                                                                                                                                                                                                                                                                                                                                                                                                                                                                                                                                                                                                                                                                                                                                                                                                                                                                                                                                         | <i>Interventions</i>                                                                                                                                                                                                                                                                                                                         |                                                                                                                                                                                                                                                                                                                                                                                                                                                                                                                                                                                                                                                                                                                                                                                                                                                                                                                                                                                                                                                                                                               |
| 1. exp Education, Medical/ or exp School, Medical/ or exp Faculty, Medical/ <b>188025</b><br>2. exp Education, Medical, Undergraduate/ or exp "Internship or Residency"/ <b>24532</b><br>3. exp Education, Medical, Graduate/ <b>71547</b><br>4. (medical adj (student\$ or undergrad\$ or resident\$)).tw. <b>44358</b> | 5. (mental or physical or social or intellectual or occupational or mental health or mental disorder or physical health or physical disorder or occupational health or occupational disorder or social health or social disorder or intellectual health or intellectual disorder or health or quality of life or health related quality of life or health-related quality of life).tw <b>3184020</b><br>6. exp Emotions/ or exp Stress, Psychological/ <b>360582</b><br>7. (emotion or affect or mood or anxiety or anxious or fear or frustration or happiness or happy or sad or lonely or loneliness or pleasure or hate or anger or guilt or shame or hope or hostility or jealousy or satisfaction or cope).tw <b>1267623</b><br>8. culture.mp. or culture.tw. or cultural.tw. or individual.tw. or individuals.tw. or system.tw. or systems.tw. or systematic.tw. or program.tw. or programs.tw. or programmatic.tw <b>5758872</b><br>9. (burnout or distress or stress or stressed or well-being or well-being or wellbeing or depressed or depression or suicide).tw. <b>1381550</b><br>10. (abuse or mistreat or harassment or harass or professional or unprofessional or support or unsupport or humiliation or disparage or ignore or unsafe or safe or harm or personal service or appropriate or inappropriate or respect or disrespect).tw. <b>2551810</b><br>11. empathy/ <b>19529</b><br>12. (empathy or compassion or collegial or resilient or resilience or cooperation or collaboration or kind or kindness or integrity).tw <b>392879</b><br>13. exp prejudice/ <b>20841</b><br>14. (discriminate or discrimination or sexism or sexist or sexual or racism or race or ethnic or bias).tw <b>712368</b> | 15. exp "Surveys and Questionnaires"/ <b>1066775</b><br>16. interview/ or interviews/ <b>29507</b><br>17. Interview, Psychological/ <b>15127</b><br>18. feedback/ or response/ or responses/ <b>30096</b><br>19. ((program or training or course or curriculum or initiative) adj2 (evaluate or feedback or view or opinion)).tw <b>4559</b> | 20. or/1-4 <b>210296</b><br>21. or/5-14 <b>10967917</b><br>22. or/15-19 <b>1139534</b><br>23. and/20-22 <b>17695</b><br>24. limit 23 to english language <b>16449</b><br>25. exp Canada/ <b>161845</b><br>26. (canada or canadian).tw. <b>129599</b><br>27. 25 or 26 <b>220083</b><br>28. 24 and 27 <b>1056</b><br>29. (Canada* or Canadi* or Alberta* or Calgary* or Edmonton* or "British Columbia*" or Vancouver* or Victoria* or Manitoba* or Winnipeg* or "New Brunswick*" or Fredericton* or Moncton* or Newfoundland* or "New Foundland*" or Labrador* or "St John*" or "Saint John*" or "Northwest Territor*" or Yellowknife* or "Nova Scotia*" or Halifax* or Dalhousie* or Nunavut* or Igaluit* or Ontario* or Ontarian* or Toronto* or Ottawa* or Hamilton or Queen's or McMaster* or Kingston* or Sudbury* or "Prince Edward Island*" or Charlottetown* or Quebec* or Montreal* or McGill* or Laval* or Sherbrooke* or Nunavik* or Kuujuaq* or Inukjuak* or Puvirnituq* or Saskatchewan* or Saskatoon* or Yukon* or Whitehorse*).ti.ab. or exp Canada/ <b>305671</b><br>30. 28 and 29 <b>1056</b> |

<sup>1</sup>A medical learner defined as a learner (i.e., undergraduate non-medical [health sciences or similar] student, graduate science [MSc or PhD] student, undergraduate medical student or postgraduate medical student [resident physician]) registered in an institution whose program pertains to research or treatment of diseases and injuries relating to medicine

<sup>2</sup>Social, mental, physical, intellectual and/or occupational well-being

<sup>3</sup>Population, outcomes and intervention terms were combined within-group with the Boolean operator OR and then population terms yield was combined between-group with the intervention, and outcome terms yields using the Boolean operator AND
