# Supplementary material
Source: HighWire-hosted journal article supplement (https://www.cmajopen.ca/content/suppl/2021/07/20/9.3.E765)
Supplement: 2020-0236-3-at.pdf [file 2020-0236-3-at.pdf]

**Supplemental Table 3.** Quantitative outcomes measured for well-being domains<sup>1,2</sup>

| Social Well-being<br>N=17 (26%) |                    | Mental Well-being<br>N=6 (9%) |                    | Physical Well-being<br>N=1 (2%) |                    | Intellectual Well-being<br>N=51 (78%) |                    | Occupational Well-being<br>N=32 (49%) |                    |
|---------------------------------|--------------------|-------------------------------|--------------------|---------------------------------|--------------------|---------------------------------------|--------------------|---------------------------------------|--------------------|
| Outcome                         | N (%) <sup>3</sup> | Outcome                       | N (%) <sup>3</sup> | Outcome                         | N (%) <sup>3</sup> | Outcome                               | N (%) <sup>3</sup> | Outcome                               | N (%) <sup>3</sup> |
| Agreement                       | 7 (41%)            | Anxiety symptoms              | 1 (17%)            | Compliance                      | 1 (100%)           | Anxiety symptoms                      | 1 (2%)             | Agreement                             | 5 (16%)            |
| Behavior                        | 1 (6%)             | Experience                    | 4 (57%)            |                                 |                    | Agreement                             | 12 (23%)           | Attitudes                             | 3 (9%)             |
| Competence                      | 1 (6%)             | Implicit association          | 1 (17%)            |                                 |                    | Attitudes                             | 8 (16%)            | Compliance                            | 3 (9%)             |
| Confidence                      | 3 (18%)            | Quality of life               | 1 (17%)            |                                 |                    | Compliance                            | 4 (8%)             | Competence                            | 2 (6%)             |
| Content                         | 1 (6%)             | Satisfaction                  | 1 (17%)            |                                 |                    | Competence                            | 4 (8%)             | Confidence                            | 2 (6%)             |
| Experience                      | 3 (18%)            | Skills                        | 2 (33%)            |                                 |                    | Confidence                            | 6 (12%)            | Duties                                | 1 (3%)             |
| Knowledge                       | 3 (18%)            | Stressors                     | 1 (17%)            |                                 |                    | Content                               | 3 (6%)             | Experience                            | 8 (25%)            |
| Learning                        | 3 (18%)            |                               |                    |                                 |                    | Duties                                | 1 (2%)             | Goals                                 | 1 (3%)             |
| Perceptions                     | 3 (18%)            |                               |                    |                                 |                    | Experience                            | 10 (20%)           | Interest                              | 2 (6%)             |
| Preparedness                    | 6 (35%)            |                               |                    |                                 |                    | Goals                                 | 12 (23%)           | Performance                           | 14 (44%)           |
| Reaction                        | 1 (6%)             |                               |                    |                                 |                    | Interest                              | 23 (45%)           | Preparedness                          | 7 (22%)            |
| Satisfaction                    | 6 (35%)            |                               |                    |                                 |                    | Knowledge                             | 12 (23%)           | Satisfaction                          | 2 (6%)             |
| Skills                          | 1 (6%)             |                               |                    |                                 |                    | Perceptions                           | 12 (23%)           | Skills                                | 2 (6%)             |
| Willingness                     | 10 (59%)           |                               |                    |                                 |                    | Performance                           | 5 (10%)            | Usefulness                            | 2 (6%)             |
|                                 | 2 (12%)            |                               |                    |                                 |                    | Preparedness                          | 1 (2%)             |                                       | 2 (6%)             |
|                                 | 1 (6%)             |                               |                    |                                 |                    | Quality of intervention               | 1 (2%)             |                                       | 2 (6%)             |
|                                 |                    |                               |                    |                                 |                    | Quality of life                       | 1 (2%)             |                                       | 8 (25%)            |
|                                 |                    |                               |                    |                                 |                    | Quality of life                       | 12 (23%)           |                                       | 3 (9%)             |
|                                 |                    |                               |                    |                                 |                    | Satisfaction                          | 1 (2%)             |                                       | 1 (3%)             |
|                                 |                    |                               |                    |                                 |                    | Skills                                | 1 (2%)             |                                       |                    |
|                                 |                    |                               |                    |                                 |                    | Usefulness                            | 1 (2%)             |                                       |                    |
|                                 |                    |                               |                    |                                 |                    | Willingness                           | 1 (2%)             |                                       |                    |
|                                 |                    |                               |                    |                                 |                    |                                       | 16 (31%)           |                                       |                    |
|                                 |                    |                               |                    |                                 |                    |                                       | 5 (10%)            |                                       |                    |
|                                 |                    |                               |                    |                                 |                    |                                       | 1 (2%)             |                                       |                    |
|                                 |                    |                               |                    |                                 |                    |                                       | 1 (2%)             |                                       |                    |

<sup>1</sup>Social, mental, physical, intellectual and/or occupational well-being [Supplemental Table 3]

<sup>2</sup>More than one outcome measure was often reported in a single study for each well-being domain

<sup>3</sup>N, number of studies that reported each outcome; %, N as a proportion of studies for that domain
